# Supplementary material for: Exploration of Dual Ionic Cross-Linked Alginate Hydrogels Via Cations of Varying Valences towards Wound Healing
Source: MDPI journal article supplement (doi:10.3390/polym14235192), 2022-11-29
Supplement: s1 [file s1]

## Supplementary information

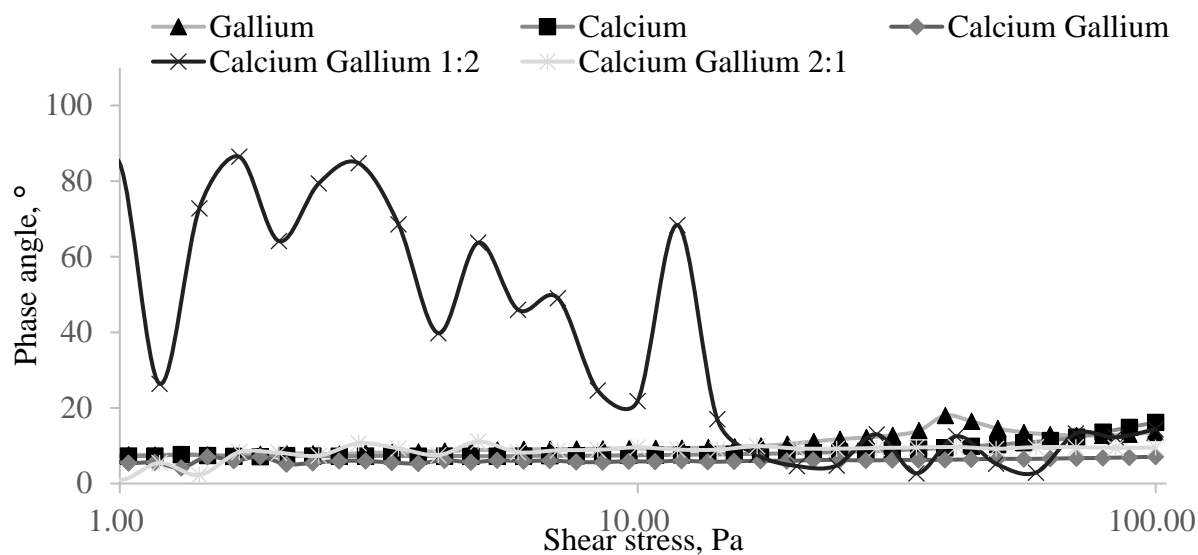

**Supplementary Figure S1.** Average phase angle values between calcium alginate, gallium alginate, calcium gallium alginate 1:1, calcium gallium alginate 1:2 and calcium gallium alginate 2:1.

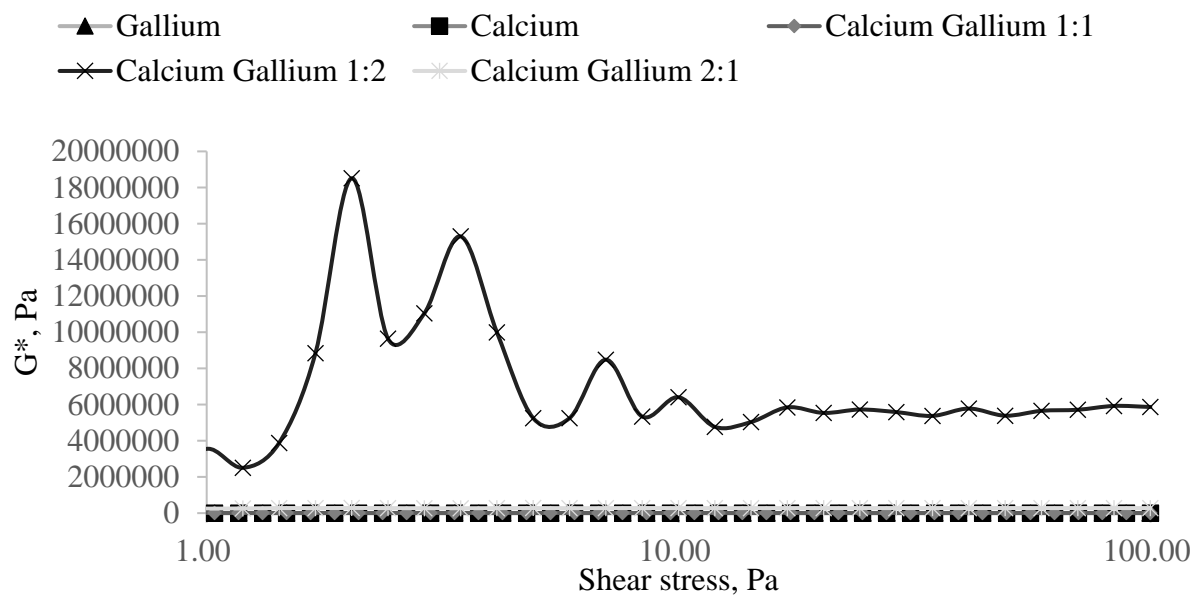

**Supplementary Figure S2.** Average complex modulus ( $G^*$ ) values between calcium alginate, gallium alginate, calcium gallium alginate 1:1, calcium gallium alginate 1:2 and calcium gallium alginate 2:1.

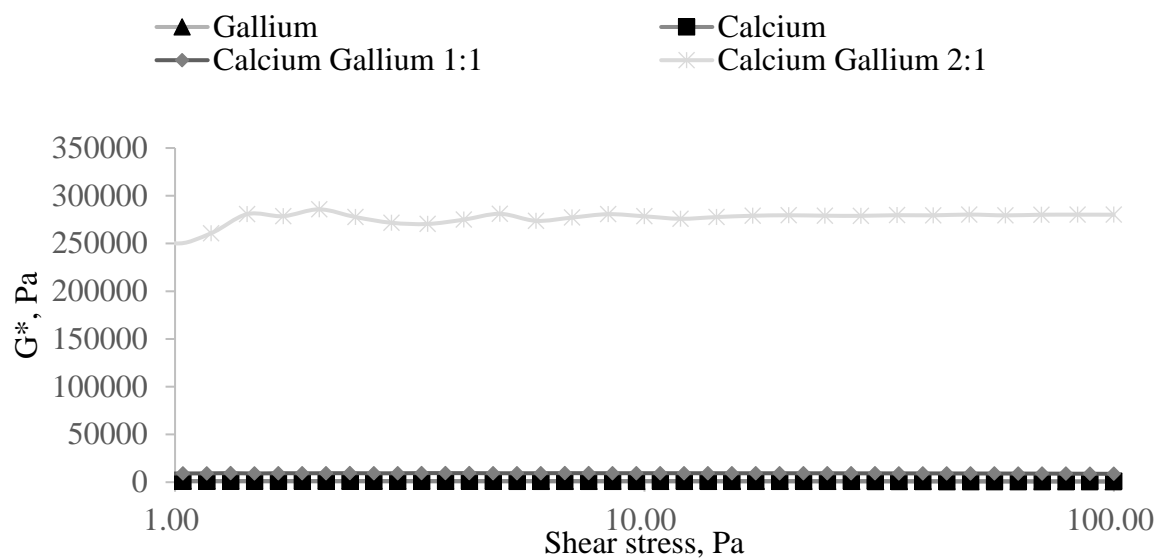

**Supplementary Figure S3.** Average complex modulus ( $G^*$ ) values between calcium alginate, gallium alginate, calcium gallium alginate 1:1 and calcium gallium alginate 2:1.

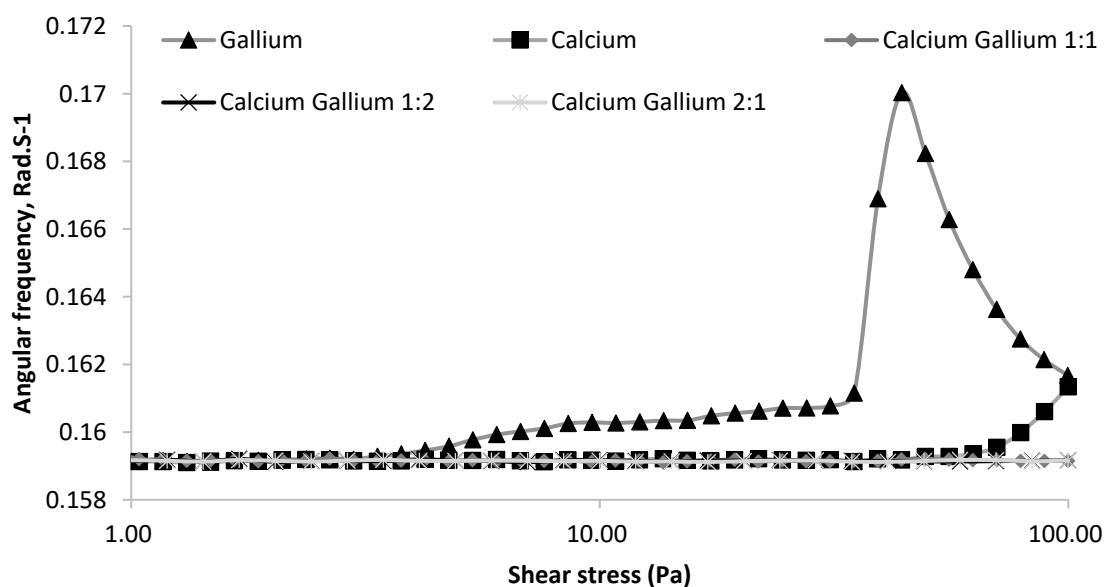

**Supplementary Figure S4.** Average angular frequency values between calcium alginate, gallium alginate, calcium gallium alginate 1:1, calcium gallium alginate 1:2 and calcium gallium alginate 2:1.

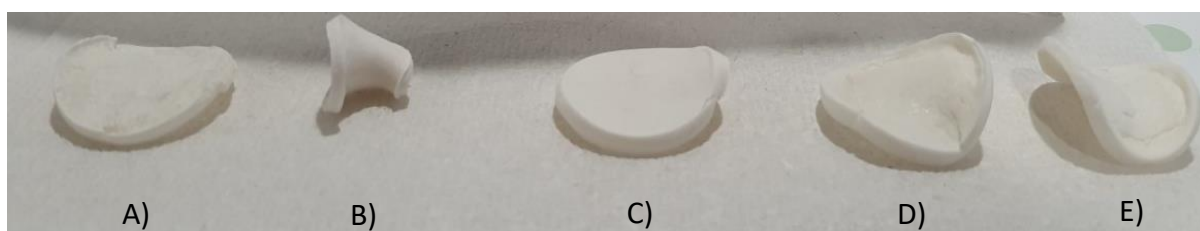

| Label | Composition         | Ca <sup>2+</sup> composition % | Average curvature ° | Change in curvature ° (±SD) |
|-------|---------------------|--------------------------------|---------------------|-----------------------------|
| A     | Gallium             | 0                              | 155.4               | 24.60 (3.769173)            |
| B     | Calcium             | 100                            | 33.569              | 146.43 (9.95437)            |
| C     | Calcium gallium 1:1 | 50                             | 127.083             | 52.92 (3.378464)            |
| D     | Calcium gallium 1:2 | 33.3                           | 139.942             | 40.06 (4.814503)            |
| E     | Calcium gallium 2:1 | 66.6                           | 77.214              | 102.786 (9.034421)          |

**Supplementary Figure S5.** Changes in macrostructural curvature as a result of open-air desiccation.

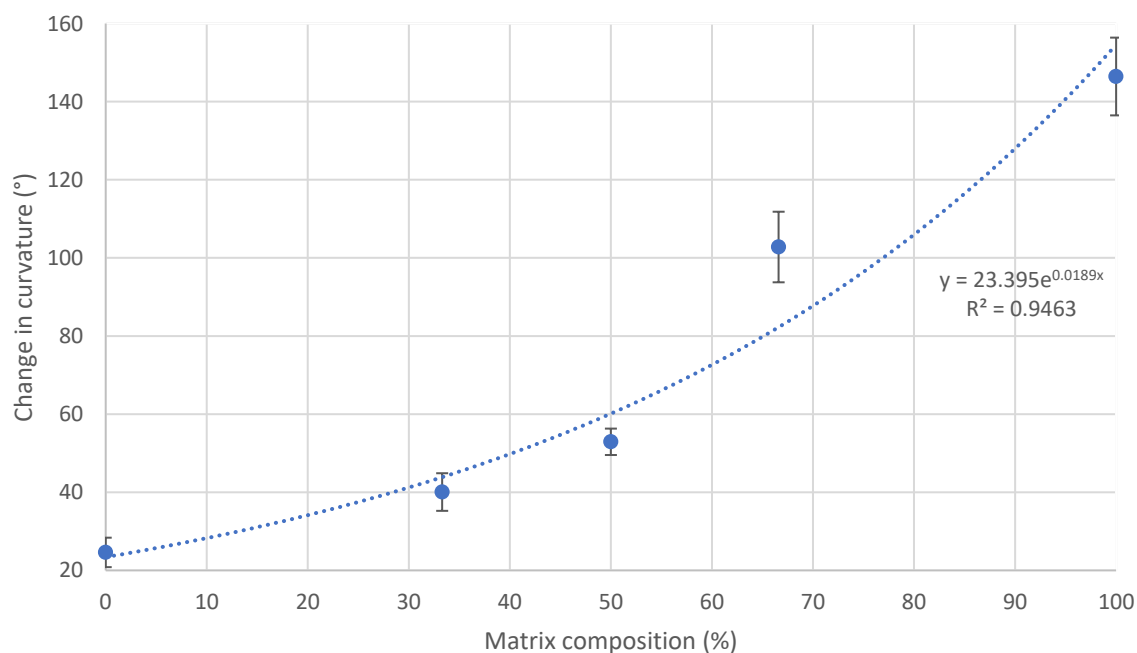

**Supplementary Figure S6.** Effects of Ca<sup>2+</sup> concentration on matrix curvature .

## Tables

**Supplementary Table S1.** Endothermic and exothermic events for calcium alginate, gallium alginate, calcium gallium alginate 1:1, calcium gallium alginate 1:2 and calcium gallium alginate 2:1.

| Type     | Endothermic event             | Exothermic event               | Time difference between endothermic and exothermic events | Temperature difference °C |
|----------|-------------------------------|--------------------------------|-----------------------------------------------------------|---------------------------|
| Ca       | 30 minutes 55seconds at 175°C | 33 minutes 5 seconds 186°C     | 3mins 50                                                  | 11                        |
| Ga       | 30 minutes 5 seconds, 171°C   | 32 minutes 10 seconds, 181 °C. | 2mins 10                                                  | 10                        |
| 1:1 caga | 31 minutes 40 seconds, 179°C  | 32 minutes 50 seconds, 190°C   | 1minute 10                                                | 11                        |
| 1:2 caga | 29 minutes 10 seconds, 166°C  | 30 minutes 35 seconds, 173°C   | 1minute 25                                                | 7                         |
| 2:1caga  | 31 minutes, 176°C             | 33 minutes 10 seconds, 187°C   | 2minute 10                                                | 11                        |

**Supplementary Table S2.** Peak position of FTIR vibrations between calcium alginate, gallium alginate, calcium gallium alginate 1:1, calcium gallium alginate 1:2 and calcium gallium alginate 2:1.

| Vibration                   | Peak position (cm <sup>-1</sup> ) |
|-----------------------------|-----------------------------------|
| O-H                         | 3000-3650                         |
| C-H - Anomer                | 2850-2980                         |
| COO - Asymmetric            | 1500-1700                         |
| COO - Symmetric             | 1350-1500                         |
| CCH+OCH                     | 1250-1350                         |
| OCO Ring                    | 1050-1100                         |
| CO – Stretching uronic acid | 920-980                           |
